# Supplementary material
Source: PubMed Central journal article supplement (PMC5738731)
Supplement: JB.00512-17_zjb002184627s1.pdf [file JB.00512-17_zjb002184627s1.pdf]

## Supplementary Materials

**Table S1 Primers used in this study**

-F and -R suffixes indicate forward and reverse primers, respectively. NdeI and HindIII restrictions sites in primer sequences are underlined.

| Primers                | Sequence                                           |
|------------------------|----------------------------------------------------|
| chsH1-F                | CGCG <u>CATATG</u> ACGGTTGTTGGTGCTGTGCTG           |
| chsH1-R                | GGCC <u>AAGCTT</u> CTACGAATCCCTCATCGAAAG           |
| chsH2-F                | GGGC <u>CATATG</u> ACCGGGGTGAGCGACATTC             |
| chsH2-R                | CCGGA <u>AAGCTT</u> CATTCGTCAGGCTCCCATGCG          |
| chsH2 $\Delta$ duf35-R | CCGCA <u>AAGCTT</u> CAACGCATCATAGCGTCGGGATCCAAATCG |
| duf35-F                | CGGC <u>CATATG</u> CGTCCCTCGTCGTCGC                |
| ltp2-F                 | GCGC <u>CATATG</u> TTATCGGGTCAGGCGGCC              |
| ltp2-R                 | GGCC <u>AAGCTT</u> AACCCAGGATCAGCCCGG              |
| ltp2nostopcodon-R      | <u>AAGCTT</u> ACCCAGGATCAGCCCGGACGTAG              |

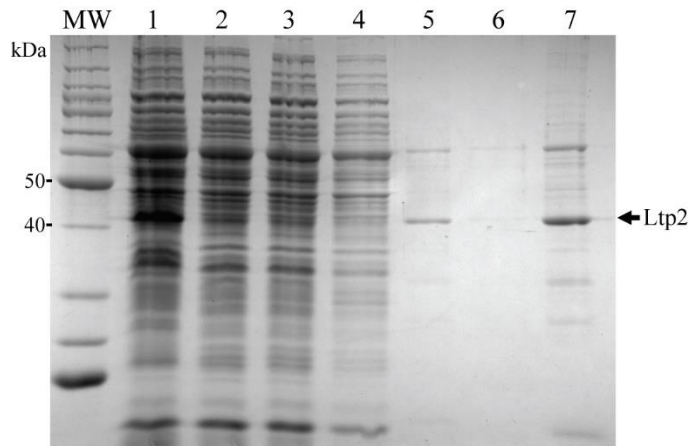

**Figure S1** Coomassie blue stained 12% SDS-PAGE of fractions from purification of N-terminal His-tagged Ltp2 from Recombinant *R. jostii* RHA1 using Ni<sup>2+</sup>-NTA chromatography. Benchmark<sup>TM</sup> protein ladder (Biorad) was used as a molecular weight marker. Samples loaded on gel are (1) insoluble cell pellet (2) crude lysate (3) flow through (4) 20 mM imidazole wash (5) 150 mM imidazole elution (6) 250 mM imidazole wash and (7) concentrated protein from 150 mM imidazole elution. Bands corresponding to the expected sizes of Ltp2 is shown on the right margin of the gel.

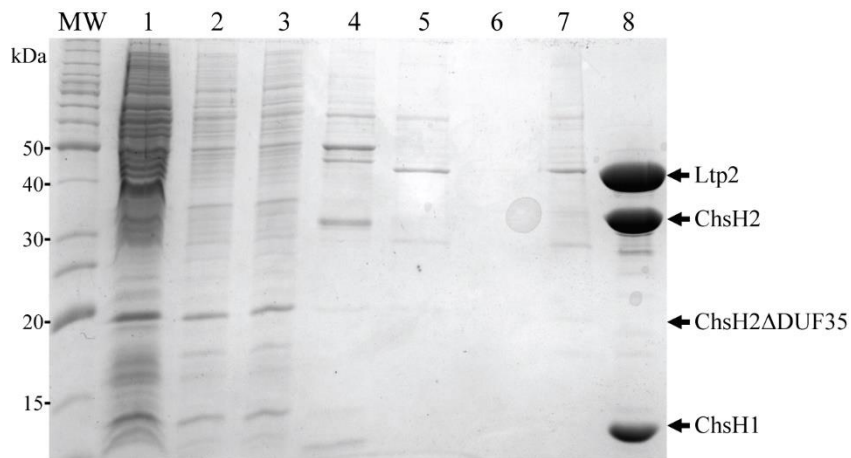

**Figure S2** Coomassie blue stained 12% SDS-PAGE of fractions from purification of C-terminal His-tagged Ltp2 and untagged ChsH1-ChsH2ΔDUF35 from Recombinant *R. jostii* RHA1 using Ni<sup>2+</sup>-NTA chromatography. Benchmark<sup>TM</sup> protein ladder (Biorad) was used as a molecular weight marker. Samples loaded on gel are (1) insoluble cell pellet (2) crude lysate (3) flow through (4) 20 mM imidazole wash (5) 150 mM imidazole elution (6) 250 mM imidazole wash and (7) concentrated protein from 150 mM imidazole elution. (8) Purified His-tagged Ltp2-ChsH1-ChsH2 complex loaded as control to show the expected positions of the various proteins on the gel.
